# Supplementary material
Source: bioRxiv or medRxiv preprint supplement (https://www.biorxiv.org/highwire/filestream/121134/field_highwire_adjunct_files/2/400119-3.pdf)

# Notes S3: Main analysis code

*Natacha Bodenhausen, Vincent Somerville and Klaus Schlaeppli (ENTER YEAR and JOURNAL HERE)*

2018-08-22

## Contents

|                                                                                           |          |
|-------------------------------------------------------------------------------------------|----------|
| <b>Abstract</b>                                                                           | <b>2</b> |
| <b>Method</b>                                                                             | <b>2</b> |
| <b>Data analysis</b>                                                                      | <b>3</b> |
| Data exploration . . . . .                                                                | 4        |
| <b>Results:</b>                                                                           | <b>7</b> |
| Alpha Diversity . . . . .                                                                 | 7        |
| Filter data . . . . .                                                                     | 11       |
| Using edgeR to normalize data (TMM) and to identify differentially abundant OTU . . . . . | 11       |
| Beta diversity . . . . .                                                                  | 12       |
| Taxonomy . . . . .                                                                        | 16       |
| Identification of P-sensitive OTUs (EDGE R analysis) . . . . .                            | 19       |
| Display of all P-sensitive OTUs per species using Ternary plots . . . . .                 | 20       |
| Comparing P-sensitive OTUs between in Arabidopsis and Petunia . . . . .                   | 22       |
| Network analysis . . . . .                                                                | 26       |
| Keystone OTUs . . . . .                                                                   | 37       |

## Abstract

In this study, we investigate the interplay between bacteria and fungi that are associated with the roots of *Petunia* plants as a function of the P availability in soil. Additionally, we examine *Arabidopsis* plants, which secrete minute amounts of strigolactones and which are not colonized by AMF. Finally, we included soil samples to control for the effect of P levels on the microbial community in the absence of plants. The goals of this study are to understand the dynamics of the root microbiome in response to the P availability in soil and to clarify the role of strigolactones as signaling molecules in this process.

## Method

*Petunia* and *Arabidopsis* were grown in pots filled with Soil from next to the FAST trial. Pots were watered with a P gradient: low, medium and high. Plants were harvested after 10 weeks. Two fractions for each sample were harvested: 1) the roots were washed three times with phosphate buffer and dried on filter paper, this fraction is called the 'root' community; 2) the three washes of each sample were pooled and centrifuged, the pellet is called the 'rhizosphere'. The roots and the rhizosphere samples were stored at -80C until DNA extraction. For this data set, only the root-associated community was analyzed. In addition, soil from unplanted pot was also collected. Together, there were 108 samples (72 *Petunia* samples, 24 *Arabidopsis* samples and 12 soil samples).

DNA was extracted from the roots by Natacha with NucleoSpin Soil kit from Macherey-Nagel. For the bacterial community, a fragment of the 16S rRNA gene was amplified with primers 799F and 1193R. For the fungal community, a fragment of the intergenic spacer region 1 was amplified with primers ITS1F and ITS2 which were found in a previous comparison to perform better than other primers pairs (higher richness, little contamination with plant DNA, high percentage of Glomeraceae) . Alain prepared the fungal library and Natacha prepared the bacterial library. After clean-up, the PCR products were pooled in equimolar concentrations and sequenced at the Functional Genomics Center in Zurich with MiSeq.

# Data analysis

Data upload

Sample table

Table 1: samples

|             | low | medium | high |
|-------------|-----|--------|------|
| Arabidopsis | 8   | 7      | 9    |
| Petunia     | 7   | 8      | 9    |
| Soil        | 4   | 4      | 4    |

Define colours

Arabidopsis: red Petunia: blue Soil: brown P-levels (low, medium & high) are indicated with color tone from light to dark

|             | low                                                                                 | medium                                                                              | high                                                                                |
|-------------|-------------------------------------------------------------------------------------|-------------------------------------------------------------------------------------|-------------------------------------------------------------------------------------|
| Arabidopsis |    |    |    |
| Petunia     |  |  |  |
| Soil        |  |  |  |

MySeq (16S): loading data from bioinformatic analysis

MySeq (ITS): loading data from bioinformatic analysis

Pacbio (ITS): loading data from bioinformatic analysis

## Data exploration

### Number of sequences per sample (data for beginning of results)

- 1) distribution of sequence counts
- 2) total amount of sequences
- 3) number of OTUs

### 16S by MiSeq

```
##      Min. 1st Qu.  Median    Mean 3rd Qu.    Max.
## 15177 27396 36718 36605 42840 65319
```

```
## [1] 2196310
```

```
## [1] 3701
```

Number of sequences per sample. Black horizontal line show the threshold used for rarefying (15'000).

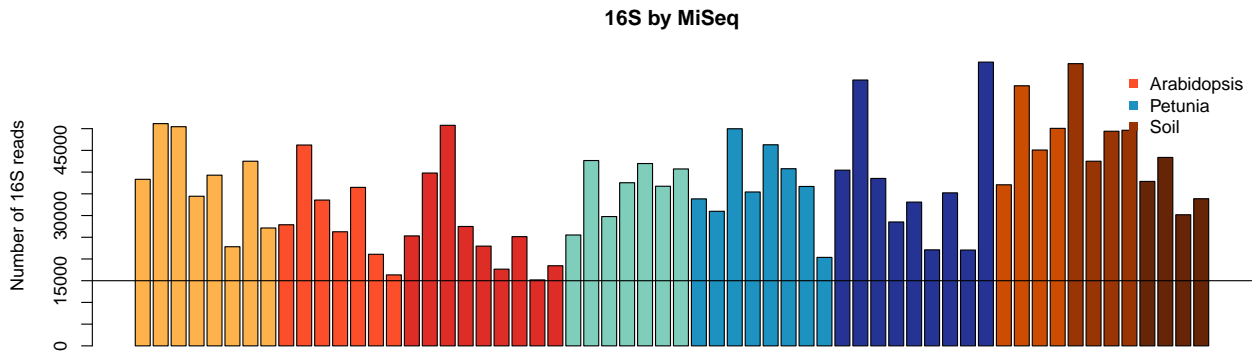

### ITS by MiSeq

```
##      Min. 1st Qu.  Median    Mean 3rd Qu.    Max.
## 1867 34906 54337 63489 84950 311084
```

```
## [1] 3809350
```

```
## [1] 1688
```

Number of sequences per sample. Black horizontal line show the threshold used for rarefying (15'000). Five samples colored in grey were removed from the analyses of rarefied data.

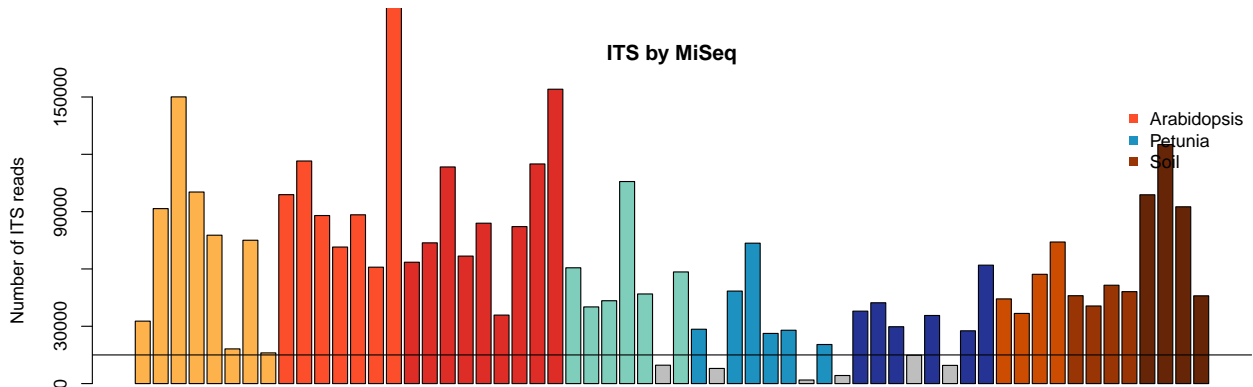



## Rarefaction analysis

### 16S bacteria data

16S Rarefaction analysis. Diversity is highest in the soil followed by Petunia and then Arabidopsis:

### 16S

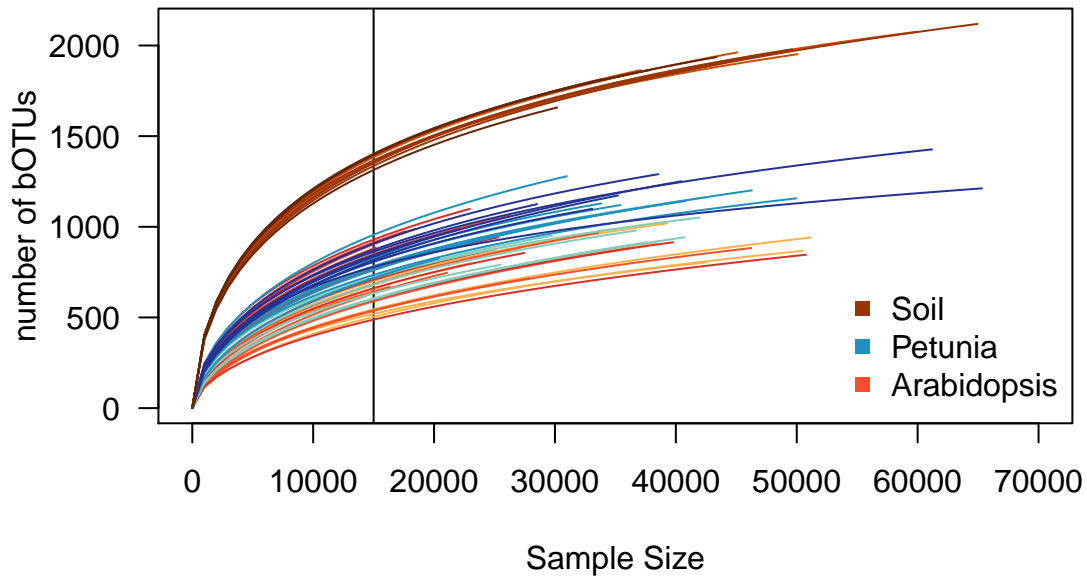

### ITS fungi data

ITS Rarefaction analysis. Diversity is highest in the soil followed by Petunia and then Arabidopsis:

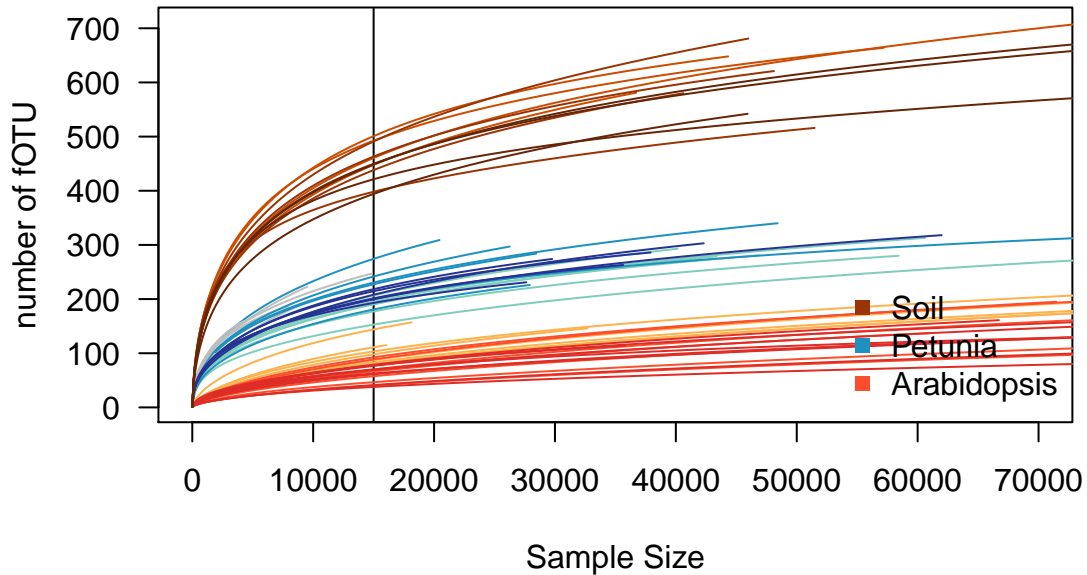

## Results:

### Alpha Diversity

#### Subset roots samples

#### Alpha Diversity: how it is done

- concentrate on plant samples (remove soil samples)
- For 16S, there are no samples below threshold (15000)
- For ITS, there are 6 samples below threshold (15000)
- rarefy to 15000 multiple times (at the moment set to 500)
- for each subsample, estimate richness, diversity and evenness
- richness=number of OTUs
- from Jost 2006: diversity is defined as  $\exp(\text{shannon})$ , shannon is calculated with diversity function of vegan package
- sheldon evenness is  $\exp(H)$  over richness (from Sheldon 1069)
- 2-factor ANOVA with plant species and P treatment (order matters)
- diagnostic plots are saved into plots folder
- after checking diagnostic plots, data are log-transformed for 4/6 cases so that assumptions are fulfilled
- in the end decide to present and discuss in the text only S and E (not  $\exp(H)$ ), because  $E = \exp(H)/S$ .

#### Compare general fungal and bacterial richness

- 1) average bOTU richness
- 2) average fOTU richness
- 3) ratio fOTU/bOTU richness

```
## Arabidopsis      Petunia
##      75.95958    205.70078
```

```
## Arabidopsis      Petunia
##      675.5473     778.2564
```

```
## Arabidopsis      Petunia
##      8.893510     3.783439
```

### Richness 16S

```
##                Df Sum Sq Mean Sq F value    Pr(>F)
## Species         1  0.2827  0.28267   14.759 0.000406 ***
## Treatment       2  0.3659  0.18297    9.554 0.000380 ***
## Species:Treatment 2  0.0315  0.01575    0.822 0.446433
## Residuals      42  0.8044  0.01915
## ---
## Signif. codes:  0 '***' 0.001 '**' 0.01 '*' 0.05 '.' 0.1 ' ' 1

S: *** T: *** SxT:
```

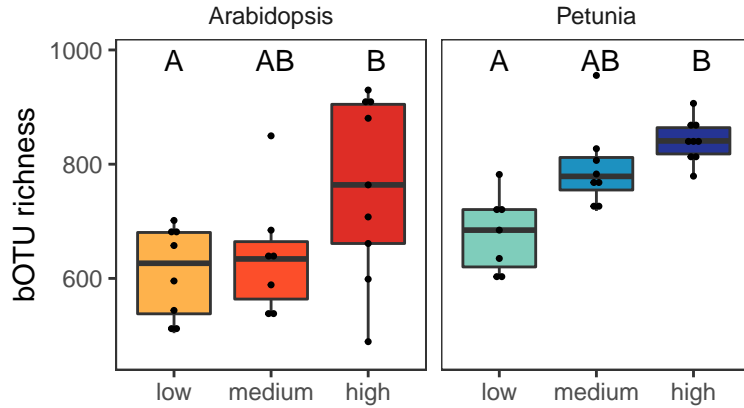

### Richness ITS

```
##                Df Sum Sq Mean Sq F value    Pr(>F)
## Species         1 11.078   11.078 242.625 <0.0000000000000002 ***
## Treatment       2  0.332    0.166   3.634   0.0365 *
## Species:Treatment 2  0.768    0.384   8.415   0.0010 **
## Residuals      36  1.644    0.046
## ---
## Signif. codes:  0 '***' 0.001 '**' 0.01 '*' 0.05 '.' 0.1 ' ' 1

S: *** T: * SxT: **
```

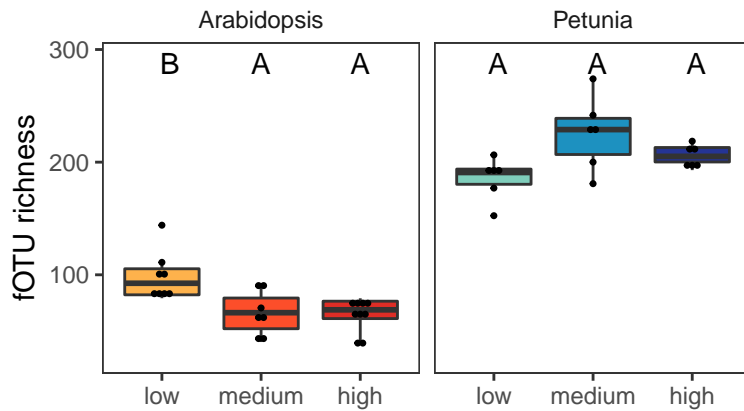



Shannon diversity 16S

```
##              Df Sum Sq Mean Sq F value    Pr(>F)
## Species          1  11989   11989  18.241 0.000109 ***
## Treatment        2   9768   4884   7.431 0.001726 **
## Species:Treatment 2    982    491   0.747 0.480109
## Residuals       42 27605    657
## ---
## Signif. codes:  0 '***' 0.001 '**' 0.01 '*' 0.05 '.' 0.1 ' ' 1

S: *** T: ** SxT:
```

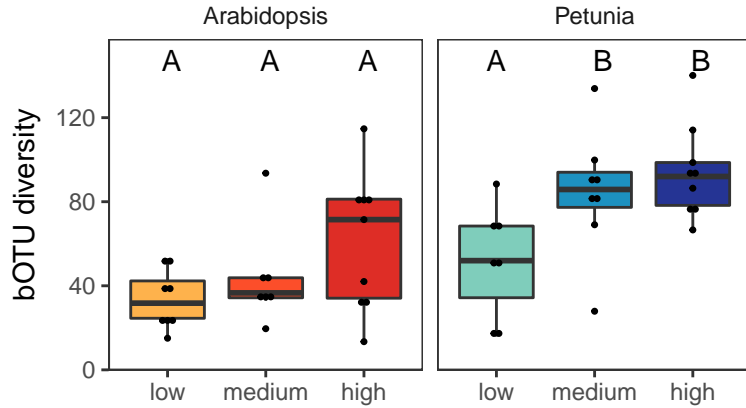

Shannon diversity ITS

```
##              Df Sum Sq Mean Sq F value    Pr(>F)
## Species          1  65.22   65.22 1078.485 <0.0000000000000002 ***
## Treatment        2   0.00    0.00   0.004    0.996
## Species:Treatment 2   0.12    0.06   1.002    0.377
## Residuals       36   2.18    0.06
## ---
## Signif. codes:  0 '***' 0.001 '**' 0.01 '*' 0.05 '.' 0.1 ' ' 1

S: *** T: SxT:
```

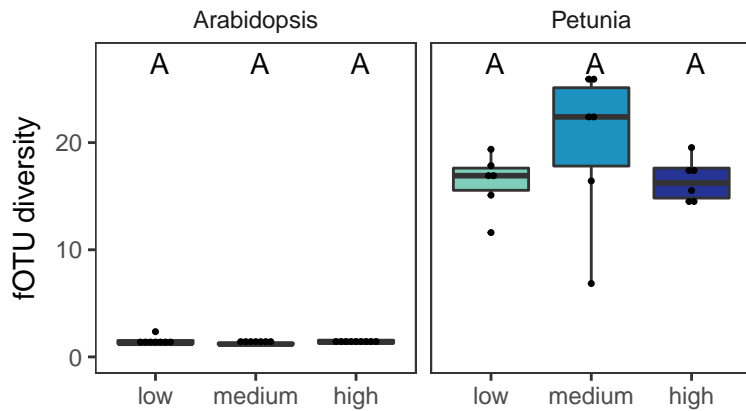

Sheldon evenness 16S

```
##              Df  Sum Sq Mean Sq F value  Pr(>F)
## Species      1  0.012990 0.012990  18.248 0.000109 ***
## Treatment    2  0.007412 0.003706   5.206 0.009552 **
## Species:Treatment  2  0.000768 0.000384   0.539 0.587132
## Residuals    42  0.029898 0.000712
## ---
## Signif. codes:  0 '***' 0.001 '**' 0.01 '*' 0.05 '.' 0.1 ' ' 1

S: *** T: ** SxT:
```

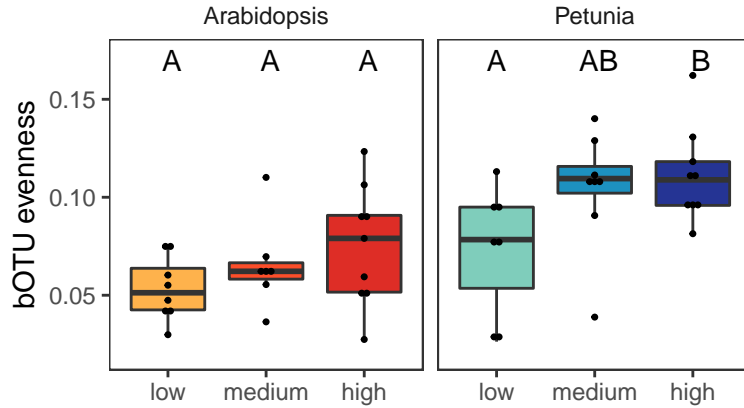

Sheldon evenness ITS

```
##              Df Sum Sq Mean Sq F value      Pr(>F)
## Species      1 22.414  22.414 406.571 <0.0000000000000002 ***
## Treatment    2   0.338   0.169   3.067   0.0589 .
## Species:Treatment  2   0.499   0.250   4.527   0.0176 *
## Residuals    36   1.985   0.055
## ---
## Signif. codes:  0 '***' 0.001 '**' 0.01 '*' 0.05 '.' 0.1 ' ' 1

S: *** T: . SxT: *
```

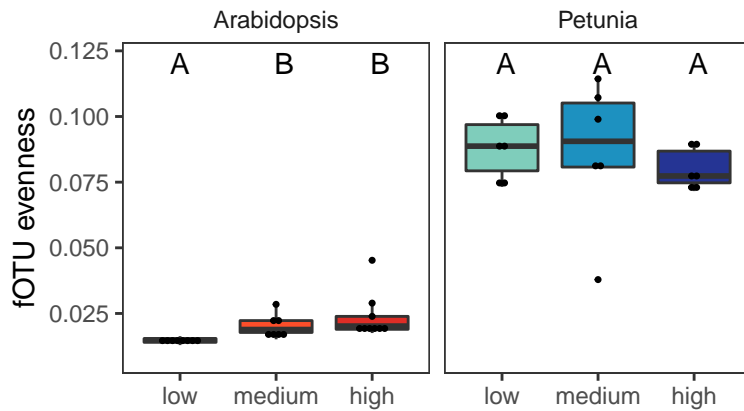

## Filter data

- for beta diversity
- to identify differentially abundant OTUs (edgeR)
- Charlotte's filtering strategy: We exclude all OTUs that don't have at least 4 assigned reads in at least 4 samples (the size of the smallest group in our data).
- For 16S, there are 1456 OTU left for the analysis. This corresponds to about a third of the OTUs: 39.34 of the initial OTUs (3701)
- For ITS, there are 508 OTU left for the analysis. This corresponds to 30.09% of the initial OTUs (1688)
- For Pacbio, there are 109 OTU left for the analysis. This corresponds to 32.54% of the initial OTUs (335)
- we do NOT rarefy for beta diversity and the rest of the analysis
- we use TSS normalization for beta-diversity
- we use TMM normalization for edgeR
- what about barplots, ternary plot and plot individual OTUs, do we use TSS or TMM ? to be decided.

## Using edgeR to normalize data (TMM) and to identify differentially abundant OTU

- work also with soil samples for this analysis
- filtered data

## Beta diversity

- two plots for each 16S and ITS, first with soil (supplementary) and without soil samples (main text)
- data normalized (TSS, log=FALSE)
- like Leff et al., use square-root transformed data.
- Bray-Curtis dissimilarity (binary=FALSE)
- PCoA
- Phyloseq package

## Principle Coordinate Analysis, WITH SOIL SAMPLES (Figure S5)

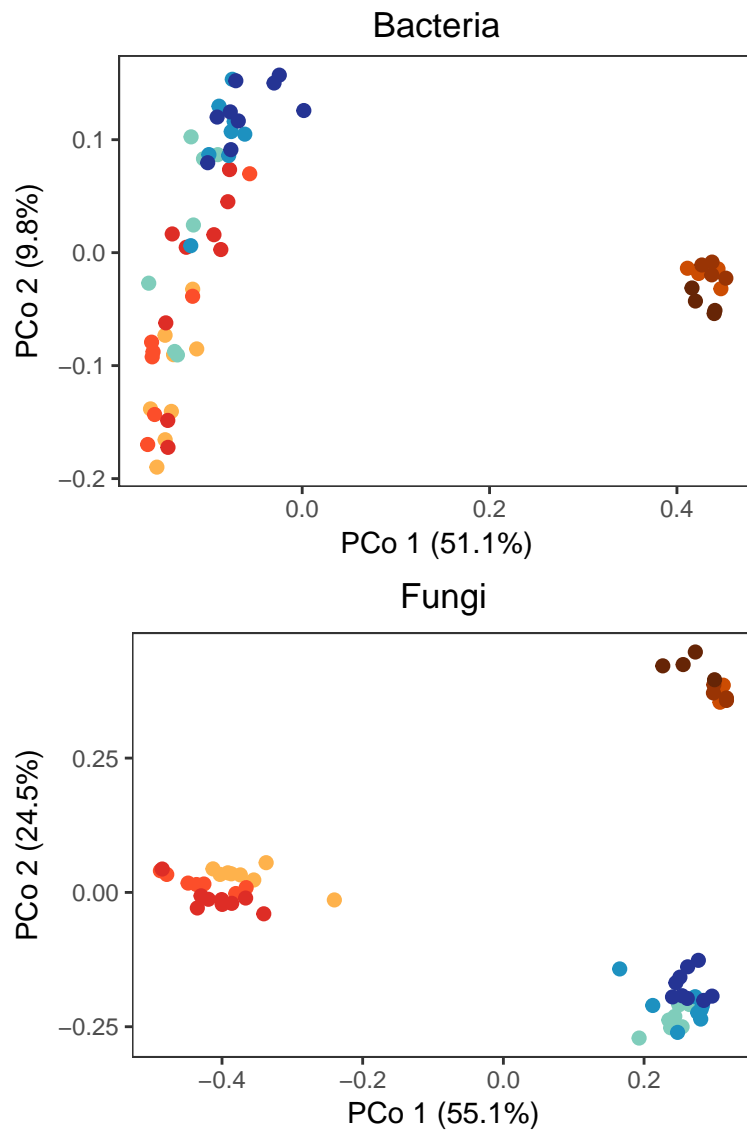

Principle Coordinate Analysis, ROOT SAMPLES (Figure 4)

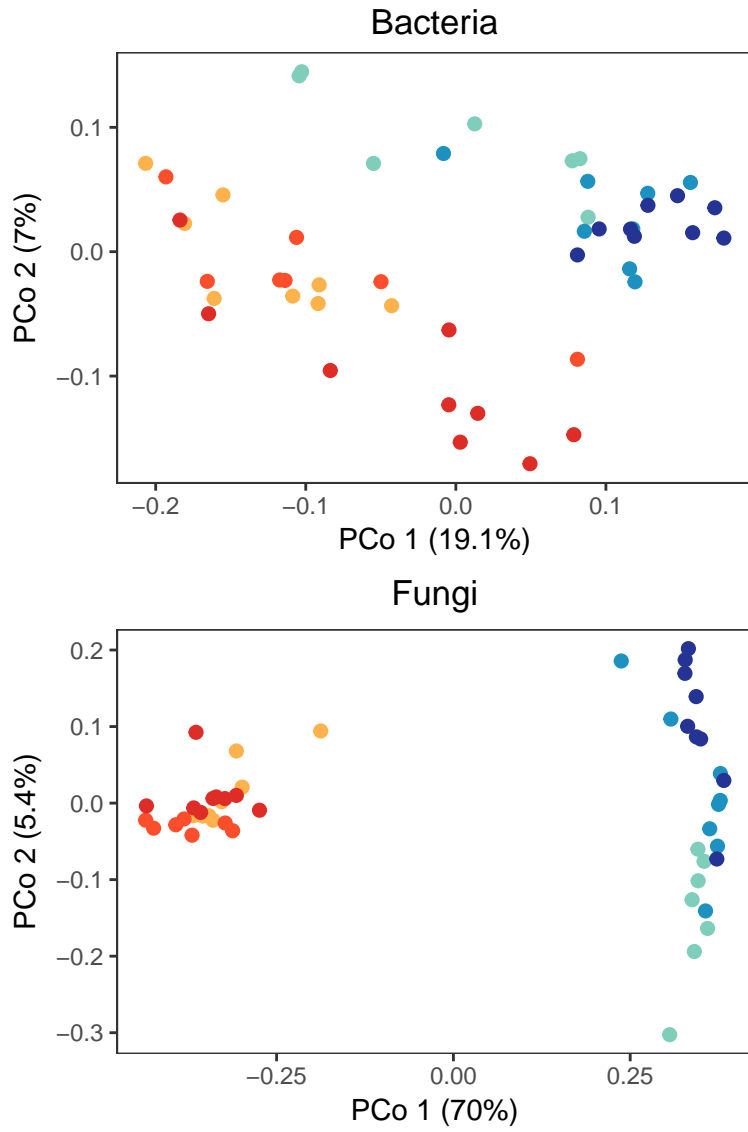

PERMANOVA (Tables S2 and S3)

adonis plant 16S

Table 2: Table continues below

|                                                                        | R2      |
|------------------------------------------------------------------------|---------|
| sampleTable_plant_16S\$Species                                         | 0.1412  |
| sampleTable_plant_16S\$Treatment                                       | 0.07188 |
| sampleTable_plant_16S <i>Species : sampleTable_plant_16S</i> Treatment | 0.05336 |
| Residuals                                                              | 0.7336  |
| Total                                                                  | 1       |
| NA                                                                     | NA      |

  

|                                                                        | Pr(>F) |
|------------------------------------------------------------------------|--------|
| sampleTable_plant_16S\$Species                                         | 0.001  |
| sampleTable_plant_16S\$Treatment                                       | 0.003  |
| sampleTable_plant_16S <i>Species : sampleTable_plant_16S</i> Treatment | 0.028  |
| Residuals                                                              | NA     |
| Total                                                                  | NA     |
| NA                                                                     | NA     |

adonis only Arabidopsis 16S

|                                      | R2     | Pr(>F) |
|--------------------------------------|--------|--------|
| sampleTable_plant_16S_ara\$Treatment | 0.1502 | 0.001  |
| Residuals                            | 0.8498 | NA     |
| Total                                | 1      | NA     |

adonis only Petunia 16S

|                                      | R2     | Pr(>F) |
|--------------------------------------|--------|--------|
| sampleTable_plant_16S_pet\$Treatment | 0.1412 | 0.004  |
| Residuals                            | 0.8588 | NA     |
| Total                                | 1      | NA     |

adonis plant ITS

Table 6: Table continues below

|                                                                   | R2      |
|-------------------------------------------------------------------|---------|
| sampleTable_plant_ITS\$Species                                    | 0.5306  |
| sampleTable_plant_ITS\$Treatment                                  | 0.03846 |
| sampleTable_plant_ITS\$Species : sampleTable_plant_ITS\$Treatment | 0.03748 |
| Residuals                                                         | 0.3934  |
| Total                                                             | 1       |
| NA                                                                | NA      |

  

|                                                                   | Pr(>F) |
|-------------------------------------------------------------------|--------|
| sampleTable_plant_ITS\$Species                                    | 0.001  |
| sampleTable_plant_ITS\$Treatment                                  | 0.07   |
| sampleTable_plant_ITS\$Species : sampleTable_plant_ITS\$Treatment | 0.064  |
| Residuals                                                         | NA     |
| Total                                                             | NA     |
| NA                                                                | NA     |

adonis only Arabidopsis ITS

|                                      | R2    | Pr(>F) |
|--------------------------------------|-------|--------|
| sampleTable_plant_ITS_ara\$Treatment | 0.217 | 0.002  |
| Residuals                            | 0.783 | NA     |
| Total                                | 1     | NA     |

adonis only Petunia ITS

|                                      | R2     | Pr(>F) |
|--------------------------------------|--------|--------|
| sampleTable_plant_ITS_pet\$Treatment | 0.1327 | 0.053  |
| Residuals                            | 0.8673 | NA     |
| Total                                | 1      | NA     |

# Taxonomy

## 16S Barplot at phylum level

- We use TSS normalized counts that are expressed as permilles for taxonomic data display.

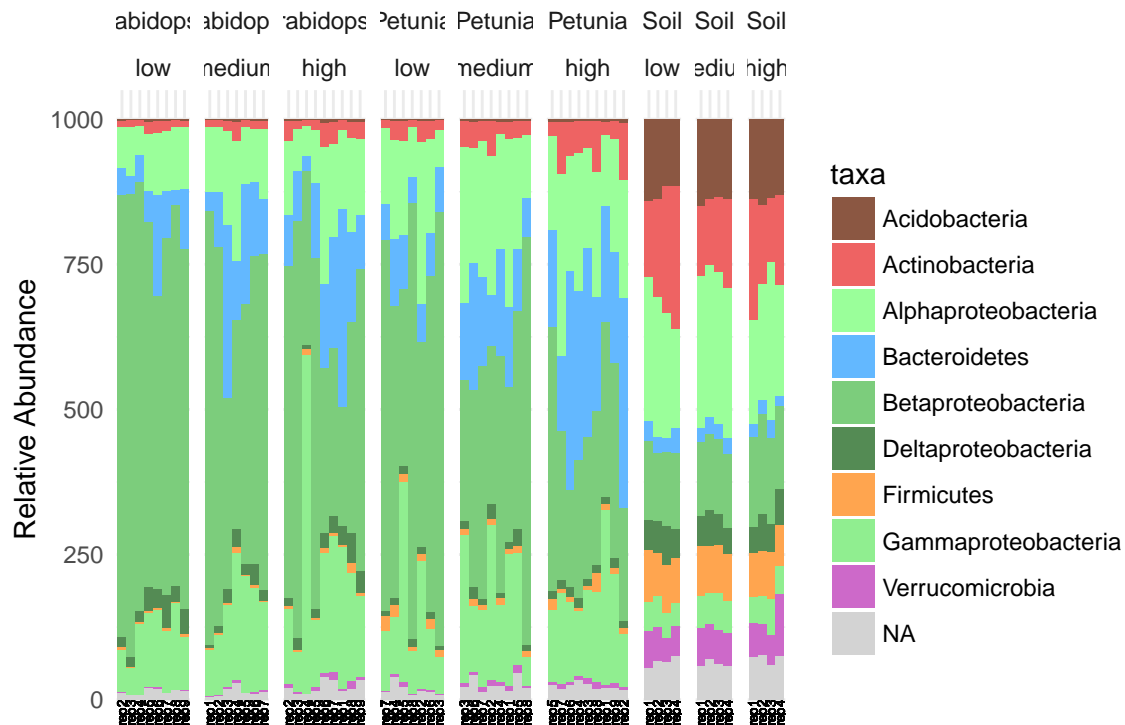



ITS Barplot at phylum level

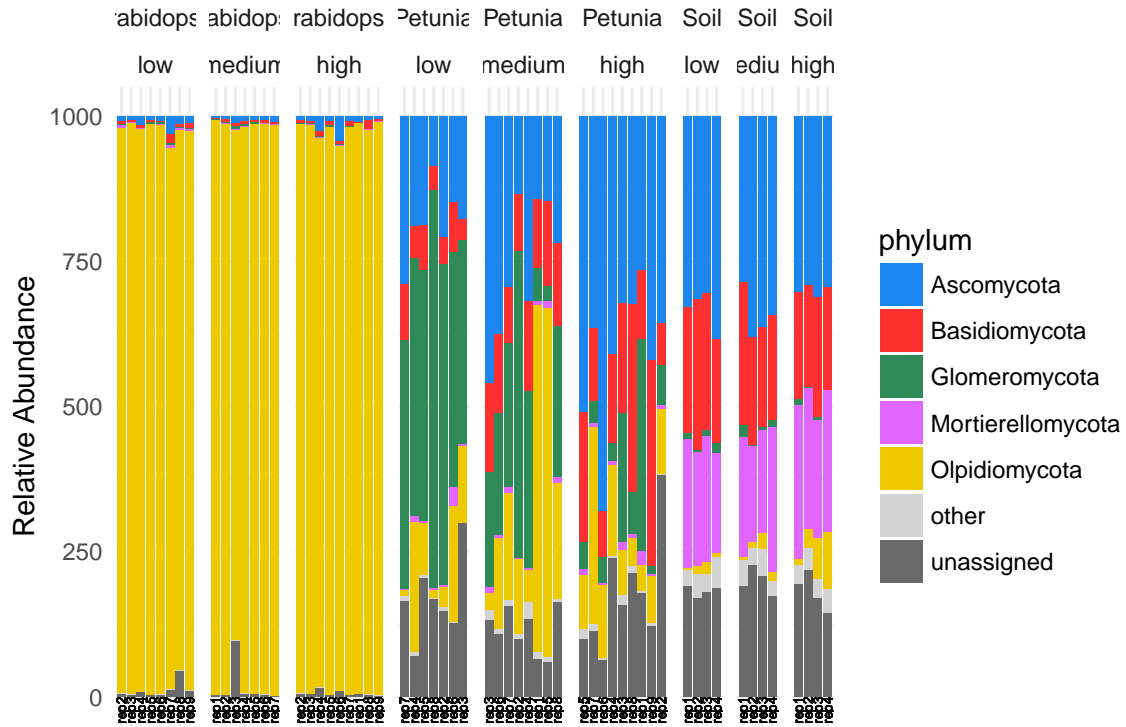

PACBIO Barplot at phylum level

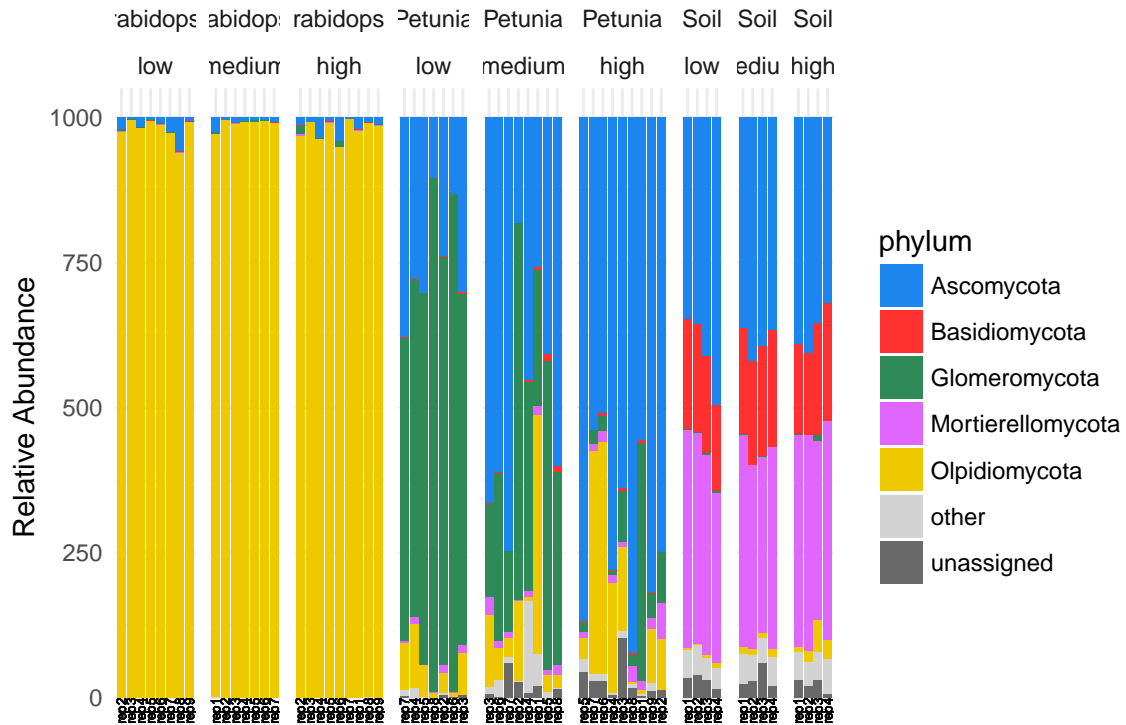

## Abundant *Olpidium* in fungal data

### MiSeq data

```
##           Phylum      Order      Genus
## fOTU_2  Olpidiomyota Olpidiales  Olpidium
## fOTU_1  Olpidiomyota unassigned unassigned
## fOTU_527 Olpidiomyota Olpidiales  Olpidium
## fOTU_318 Olpidiomyota Olpidiales unassigned
##                                           Species
## fOTU_2  Olpidium_brassicae_SH216672.07FU
## fOTU_1                                     unassigned
## fOTU_527                                    unassigned
## fOTU_318                                    unassigned

##      OTU  Arabidopsis      Petunia      Soil
## 1  fOTU_2  21.837255409  147.166892805  9.08474461
## 2  fOTU_1  946.385653888   8.256252202  16.81503811
## 3  fOTU_527  0.007009403   0.166890898  0.04063825
## 4  fOTU_318  0.012087718   0.008079231  0.37838979
```

### Pacbio data

```
##           Phylum      Order      Genus                                           Species
## pOTU_1  Olpidiomyota Olpidiales  Olpidium  Olpidium_brassicae_SH194417.07FU
## pOTU_3  Olpidiomyota Olpidiales  Olpidium  Olpidium_brassicae_SH216672.07FU

##      OTU  Arabidopsis  Petunia      Soil
## 1  pOTU_1  961.78861  43.79451  14.2364506
## 2  pOTU_3  20.26482  61.62742  0.4885352

##                                           species  Arabidopsis  Petunia      Soil
## 1  Olpidium_brassicae_SH194417.07FU  961.78861  43.79451  14.2364506
## 2  Olpidium_brassicae_SH216672.07FU   20.26482  61.62742  0.4885352
```

## Identification of P-sensitive OTUs (EDGE R analysis)

- We use TMM transformed data
- Same filtering parameter as for beta diversity

### high P vs low P in Arabidopsis 16S

|               | up in low P | unchanged | up in high P |
|---------------|-------------|-----------|--------------|
| Treatmenthigh | 19          | 1411      | 26           |

A total of 1456 bOTUs were analyzed for differential abundance in Arabidopsis, of which 19 were increased in abundance under low P and 26 were increased in abundance under high P, corresponding to 3.1% of P responsive OTUs.

### high P vs low P in Arabidopsis ITS

|               | up in low P | unchanged | up in high P |
|---------------|-------------|-----------|--------------|
| Treatmenthigh | 49          | 445       | 14           |

A total of 508 fOTUs were analyzed for differential abundance in Arabidopsis, of which 49 were increased in abundance under low P and 14 were increased in abundance under high P, corresponding to 12% of P responsive OTUs.

### high P vs low P in Petunia 16S

|               | up in low P | unchanged | up in high P |
|---------------|-------------|-----------|--------------|
| Treatmenthigh | 17          | 1424      | 15           |

A total of 1456 bOTUs were analyzed for differential abundance in Petunia, of which 17 were increased in abundance under low P and 15 were increased in abundance under high P, corresponding to 2.2% of P responsive OTUs.

### high P vs low P in Petunia ITS

|               | up in low P | unchanged | up in high P |
|---------------|-------------|-----------|--------------|
| Treatmenthigh | 23          | 477       | 8            |

A total of 508 fOTUs were analyzed for differential abundance in Petunia, of which 23 were increased in abundance under low P and 8 were increased in abundance under high P, corresponding to 6.1% of P responsive OTUs.

## Display of all P-sensitive OTUs per species using Ternary plots

- For the display of the statistic results, we used TMM normalized counts (as used for edgeR) and express them as permilles.
- Ternary plots used scaled OTU abundances ( $\log_2(x + 1)$ )

### Arabidopsis 16S

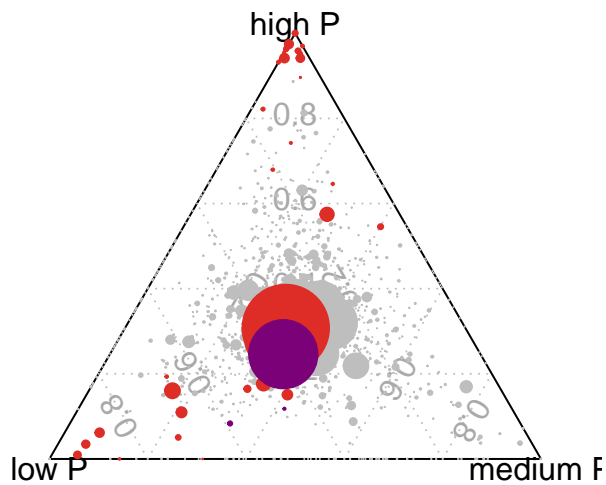

### Arabidopsis ITS

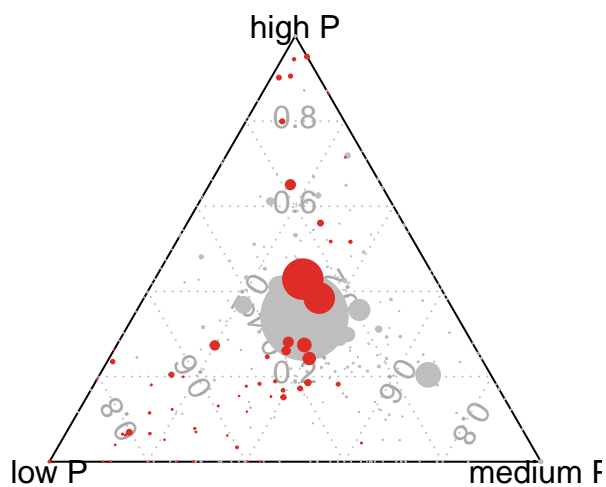

Petunia 16S

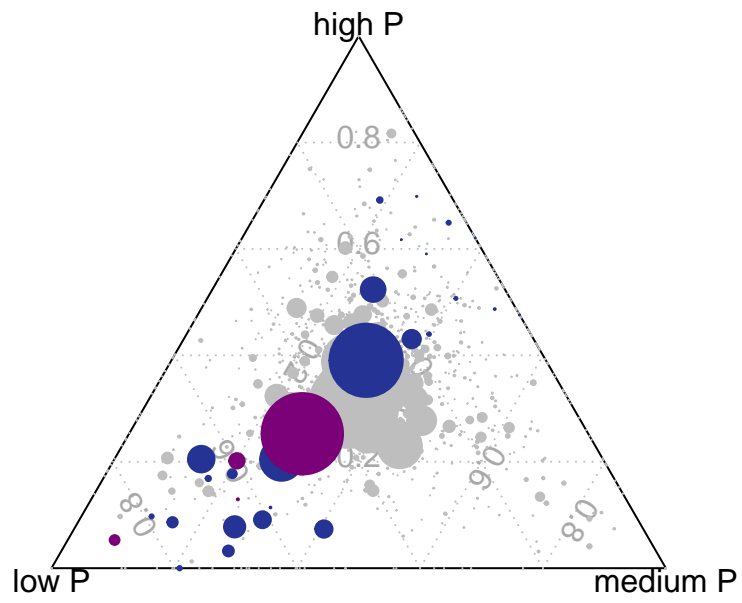

Petunia ITS

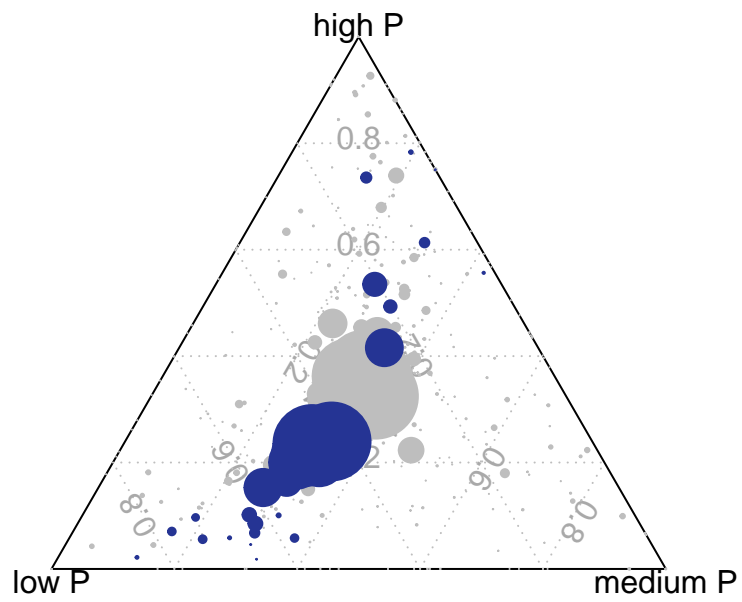

## Comparing P-sensitive OTUs between in Arabidopsis and Petunia

Bacteria (16S)

Arabidopsis                      Petunia

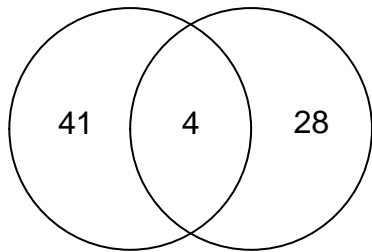

```
## [1] "bOTU_2" "bOTU_234" "bOTU_1787" "bOTU_3346"
```

fungi (ITS)

Arabidopsis                      Petunia

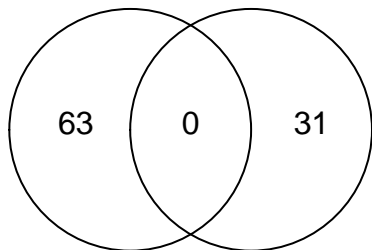

## A few representative OTUs

- For the display of the P-sensitive OTUs, we used TSS normalized counts and express them as permilles.
- Y-axis of the Boxplots present the permille values scaled by log2.

### bOTU\_2

```
##                Phylum                Class                Order                Family
## b0TU_2 Proteobacteria Betaproteobacteria Rhodocyclales Rhodocyclaceae
##                Genus                Species
## b0TU_2 Dechloromonas unassigned
```

bOTU2 Dechloromonas sp.

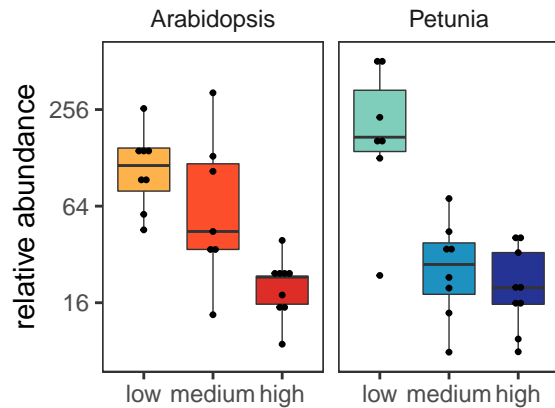

### bOTU\_13

```
##                Phylum                Class                Order                Family
## b0TU_13 Proteobacteria Betaproteobacteria Rhodocyclales Rhodocyclaceae
##                Genus                Species
## b0TU_13 unassigned uncultured_bacterium
```

bOTU13 Rhodocyclaceae sp.

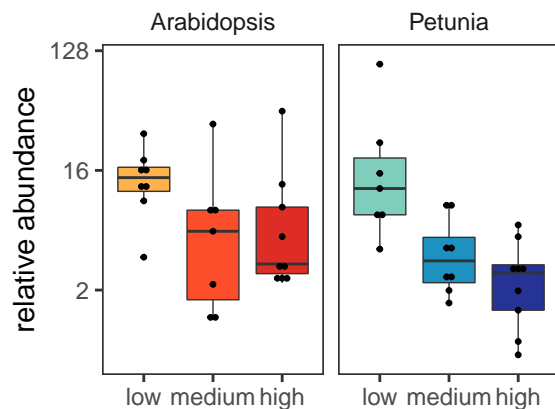

**bOTU\_134**

```
##                Phylum                Class                Order
## b0TU_134 Proteobacteria Betaproteobacteria Burkholderiales
##                Family                Genus                Species
## b0TU_134 Burkholderiaceae unassigned unassigned
```

**bOTU134 Candidatus Glomeribacter**

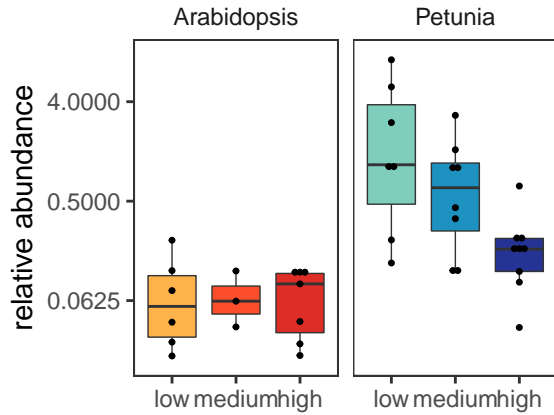

**fOTU\_7**

```
##                Phylum                Class                Order                Family
## f0TU_7 Mortierellomycota Mortierellomycetes Mortierellales Mortierellaceae
##                Genus                Species
## f0TU_7 Mortierella unassigned
```

**fOTU7 Mortierella sp.**

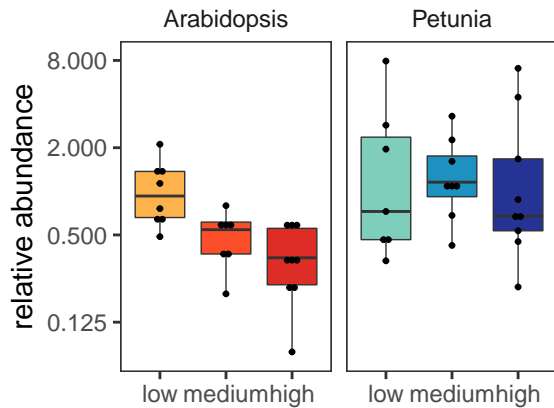



fOTU\_2

```
##           Phylum           Class           Order           Family           Genus
## f0TU_2  Olpidiomycota  Olpidiomycetes  Olpidiales  Olpidiaceae  Olpidium
##                                     Species
## f0TU_2  Olpidium_brassicae_SH216672.07FU
```

fOTU2 *Olpidium brassicae*

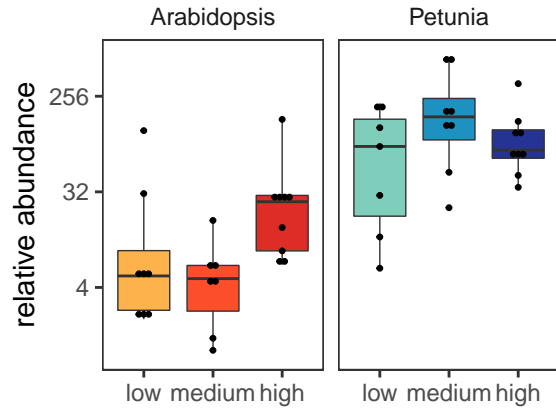

fOTU\_6 (Example for P-sensitive OTU in Petunia)

```
##           Phylum           Class           Order           Family           Genus
## f0TU_6  Glomeromycota  Glomeromycetes  Glomerales  Glomeraceae  unassigned
##                                     Species
## f0TU_6  unassigned
```

fOTU6 *Glomeraceae* sp.

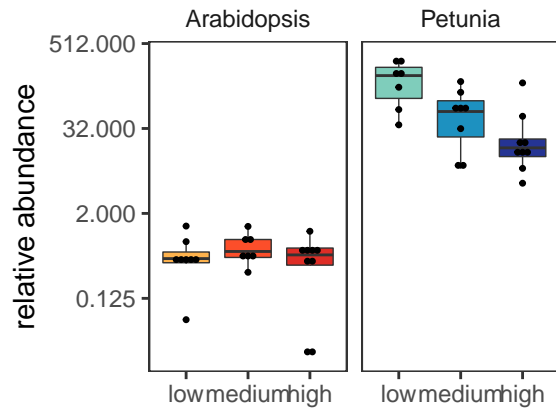

Summary tables for identified P-sensitive OTUs (EDGE R analysis)

## Network analysis

Perform Spearman rank correlation

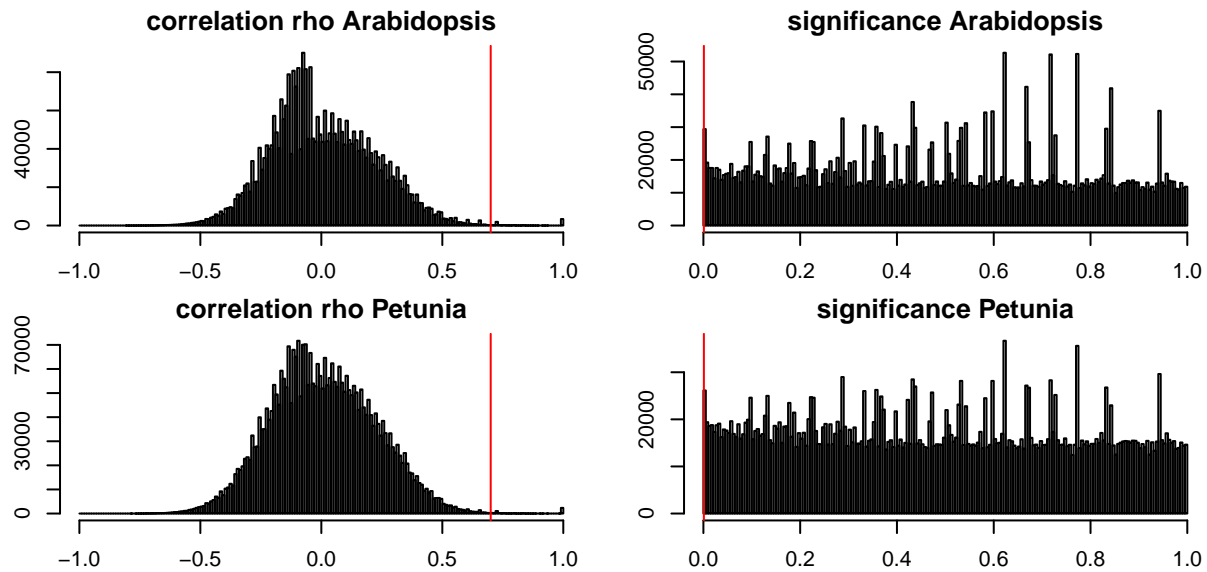

Network construction is based on Spearman rho correlation cutoff  $>0.7$  and fdr adjusted p.value cutoff  $< 0.001$ .

In Arabidopsis 2652 links between 995 OTUs (nodes) fulfill the cutoffs. In Petunia 1467 links between 918 fulfill the cutoffs.

### Number of bacteria and fungi nodes

The Arabidopsis co-occurrence network is composed of 670 bacteria and 325 fungal OTUs (nodes). The Petunia co-occurrence network is composed of 656 bacteria and 262 fungal OTUs (nodes).

### Defining node shape and color

Defining P behaviour of microbes to be used as node attributes (response to phosphate treatments based on three categories: positive, negative and no P-dependence)

Co-occurrence network plots

## Arabidopsis

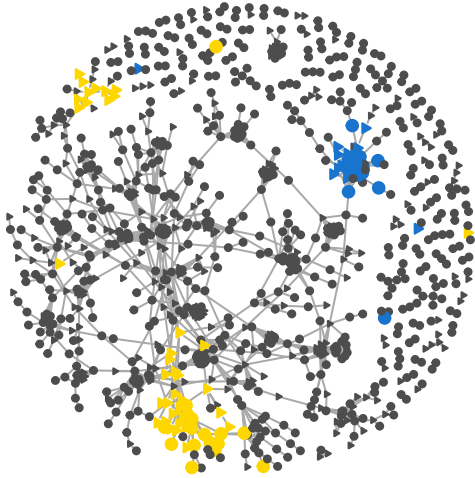

## Petunia

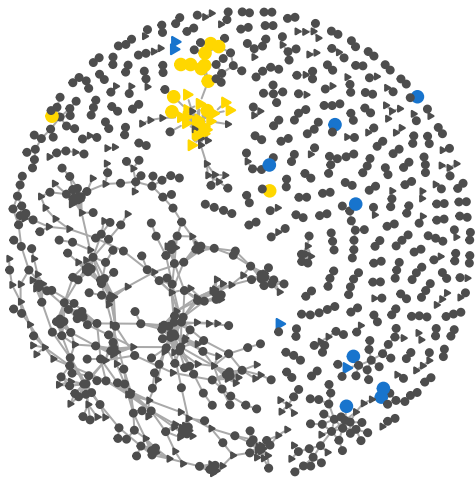

## AMF fOTUs in Arabidopsis network

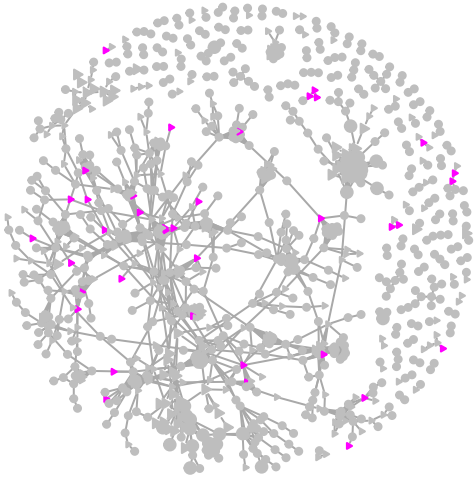

## Mortierellomycota fOTUs in Arabidopsis

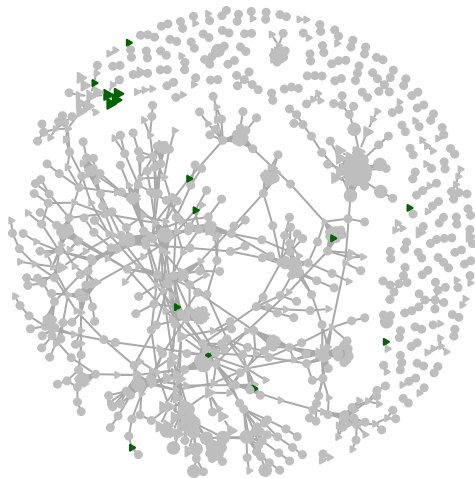

AMF fOTUs (pink) and endobacteria bOTUs (black) in Petunia network

### AMF fOTUs in Petunia network

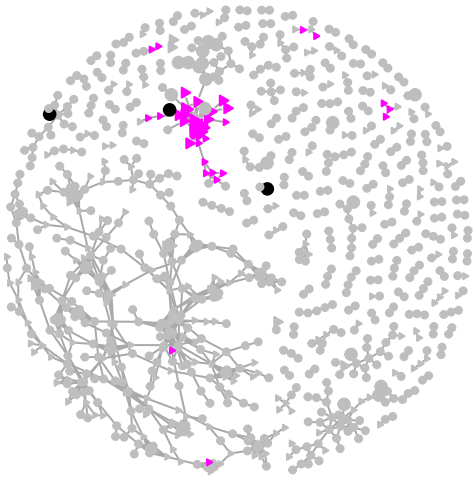

### Mortierellomycota fOTUs in Petunia

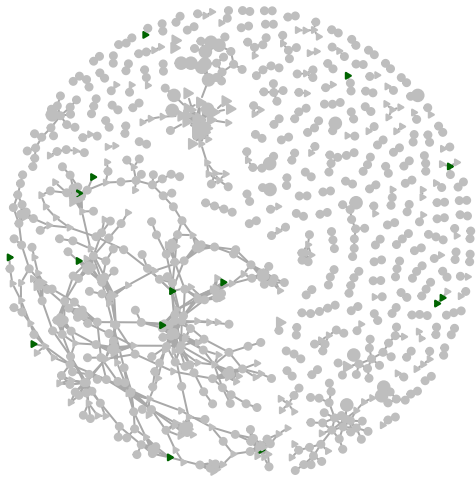

## Module detection using hclust ([www.kateto.net/networks-r-igraph](http://www.kateto.net/networks-r-igraph))

Next, we statistically partition the network into discrete community modules using the *edge betweenness by Newman-Girvan*. This approach identifies the modularity of these network, in which we then want to identify the modules containing the p-dependent microbes.

### Arabidopsis

```
## [1] "133 modules assigned for Arabidopsis from 995 OTUs"  
## [1] "The modularity score for Arabidopsis is 0.916376965277351"  
## [1] "Module 27 contains P responsive b/fOTUs in Arabidopsis"  
## [2] "Module 4 contains P responsive b/fOTUs in Arabidopsis"  
## [3] "Module 19 contains P responsive b/fOTUs in Arabidopsis"
```

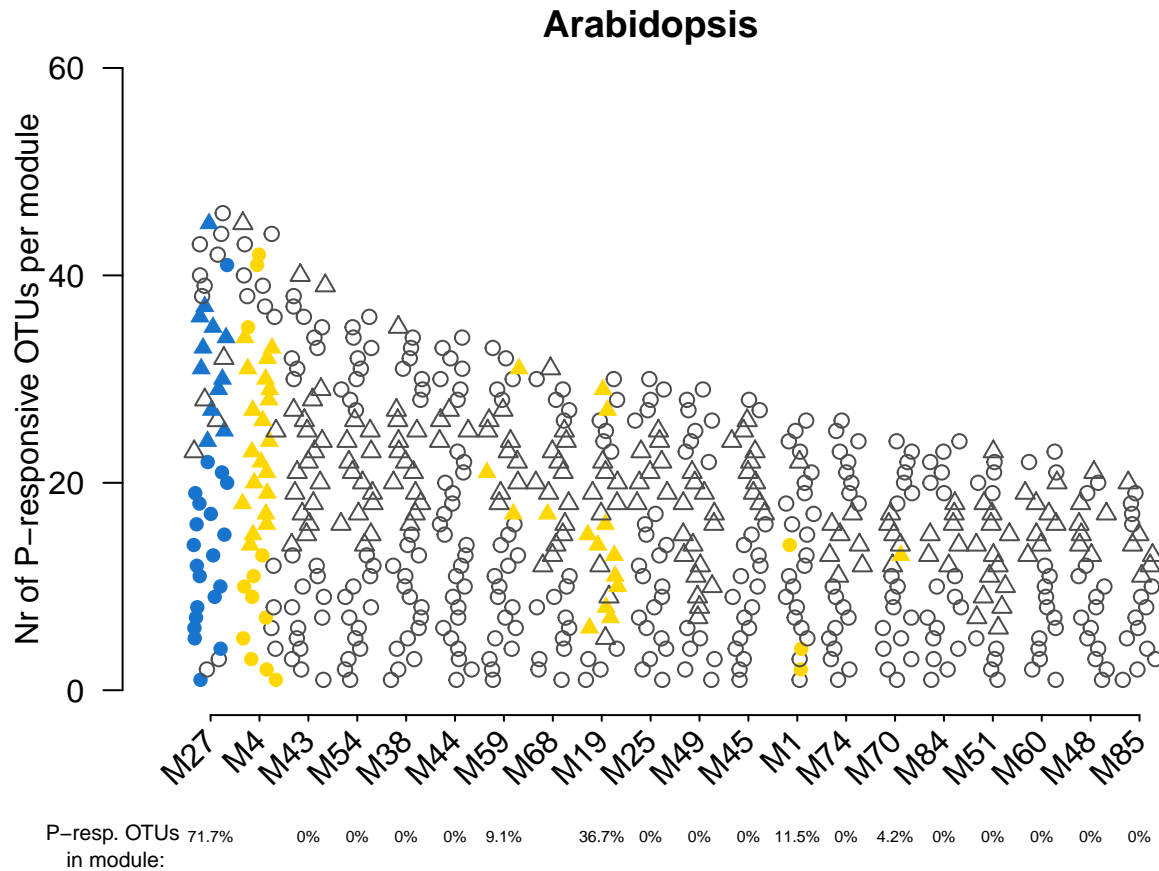

**Petunia**

## [1] "189 modules assigned for Arabidopsis from 995 OTUs"

## [1] "The modularity score for Arabidopsis is 0.916232088914539"

## [1] "Module 26 contains P responsive b/fOTUs in Petunia"

## [2] "Module 1 contains P responsive b/fOTUs in Petunia"

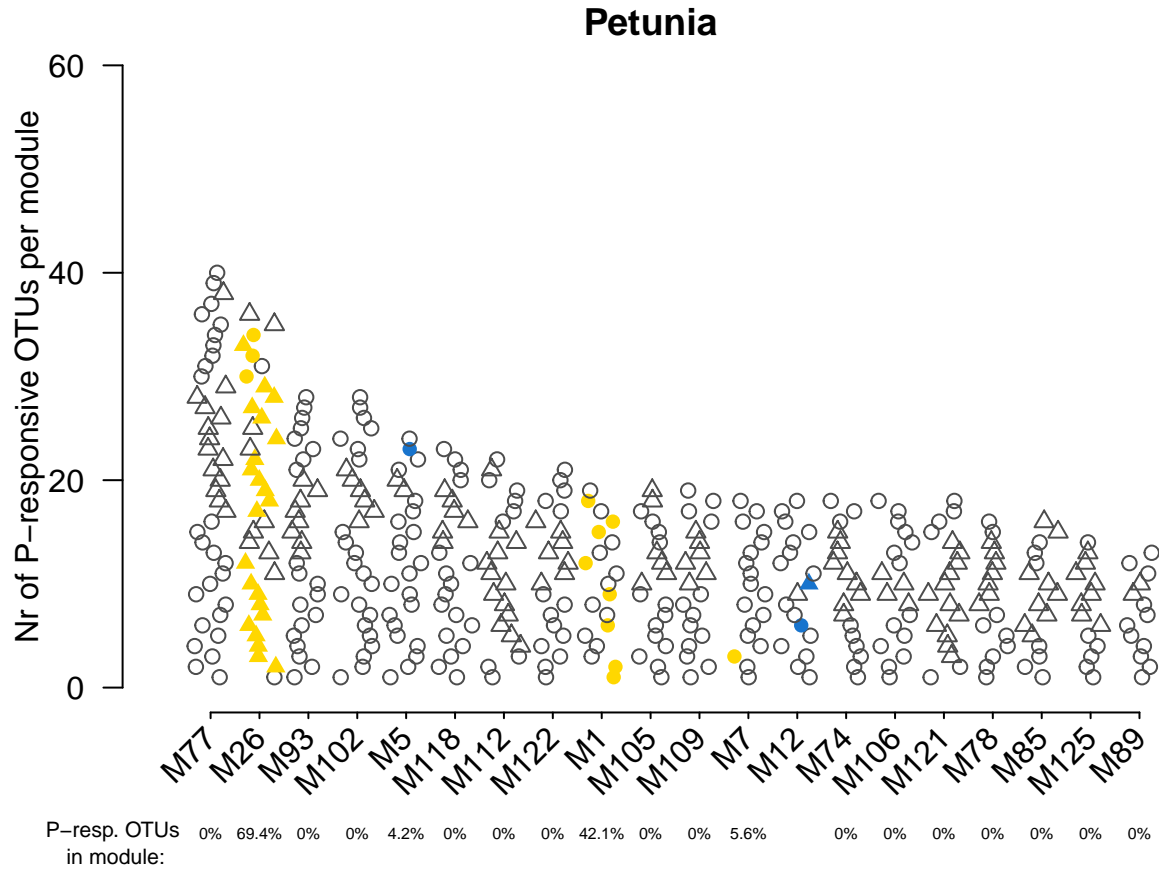

Network figure with highlighted modules

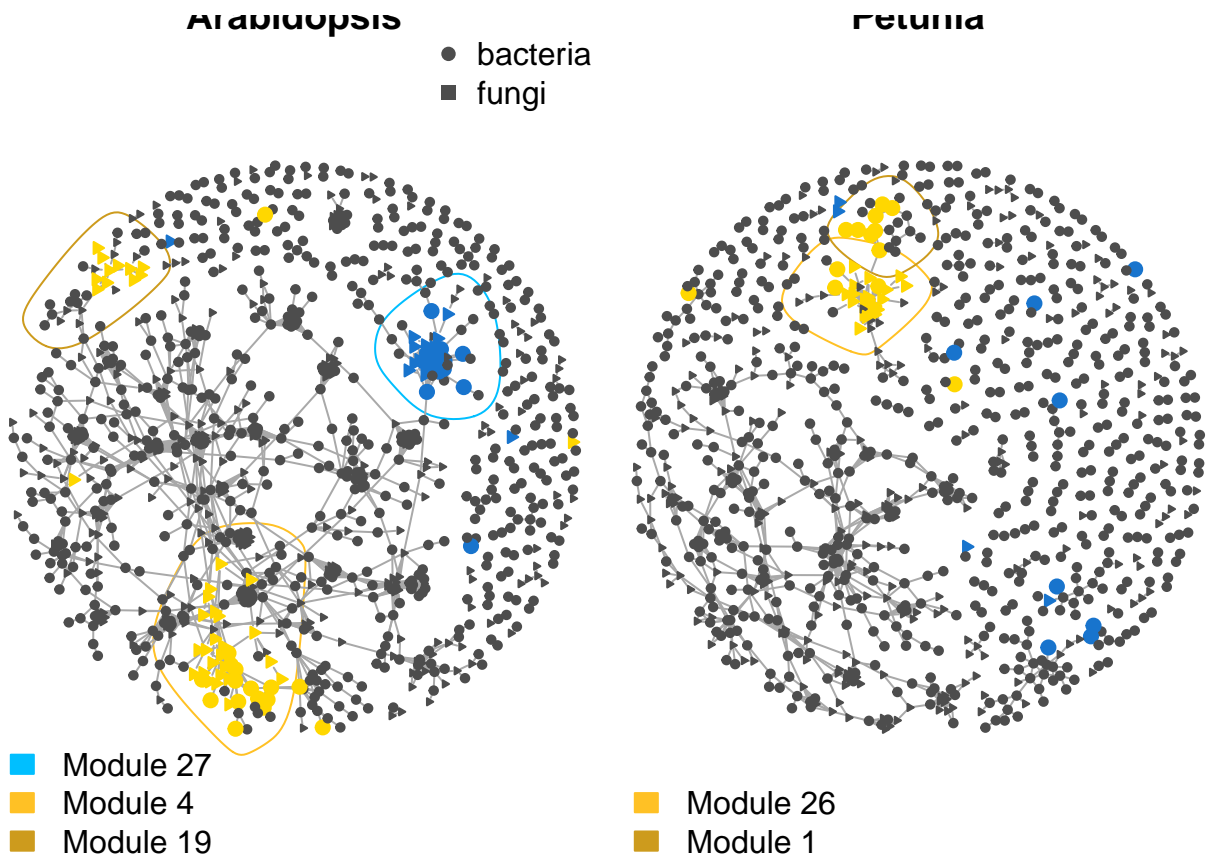

Printing Figure 6 (variant with top20 modules highlighted)



## Visualizing abundance behaviour of modules

### Arabidopsis

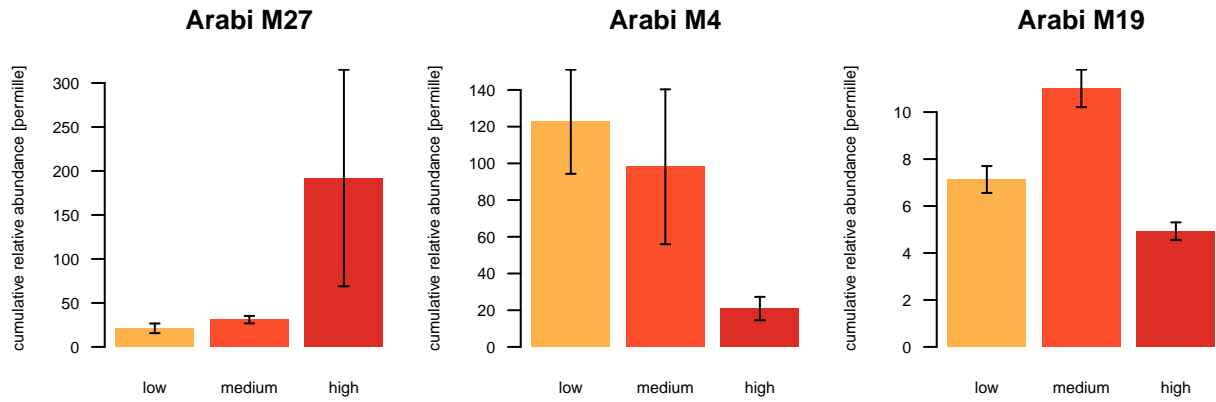

### Petunia

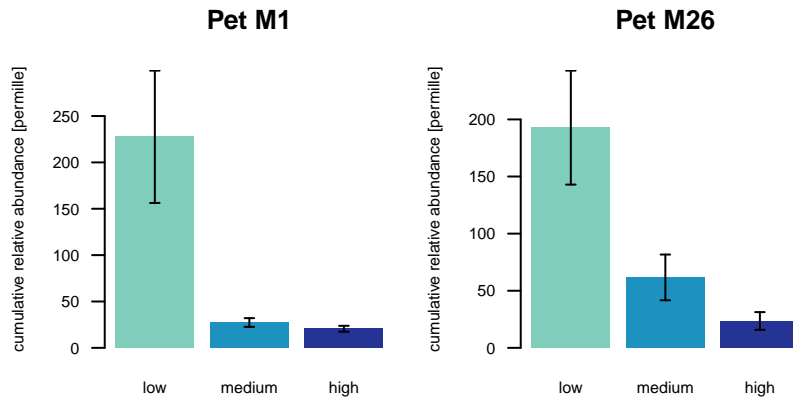

Shared OTU occurrence in Arabidopsis and Petunia modules?

1) between low-P responsive modules of Arabidopsis and Petunia?

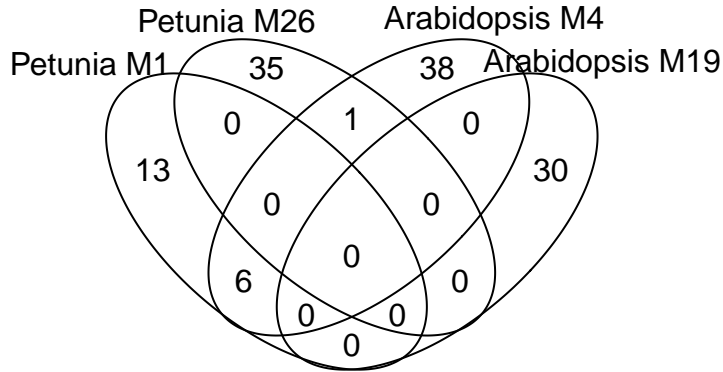

| ##           | Phylum         | Order             | Genus             |
|--------------|----------------|-------------------|-------------------|
| ## bOTU_3346 | Proteobacteria | Sphingomonadales  | unassigned        |
| ##           | Phylum         | Order             | Genus             |
| ## bOTU_1787 | Proteobacteria | unassigned        | unassigned        |
| ## bOTU_1874 | Proteobacteria | unassigned        | unassigned        |
| ## bOTU_1802 | Proteobacteria | Burkholderiales   | Massilia          |
| ## bOTU_234  | Proteobacteria | Bdellovibrionales | Bdellovibrio      |
| ## bOTU_2    | Proteobacteria | Rhodocyclales     | Dechloromonas     |
| ## bOTU_12   | Proteobacteria | Rhodocyclales     | Methyloversatilis |

2) between low-P Petunia and high-P Arabidopsis modules?

**low P Petunia to high P Arabi OTUs**

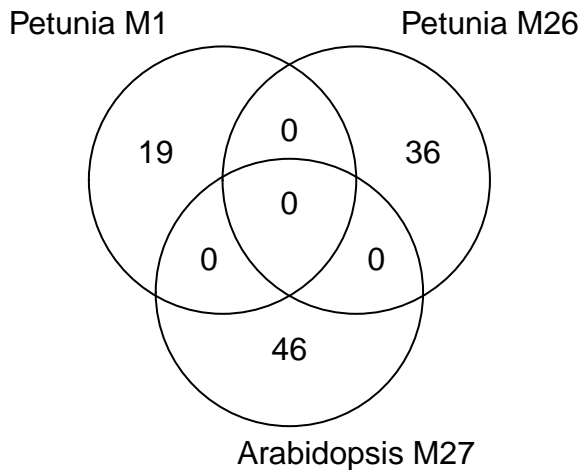





## Keystone OTUs

We identified keystone OTUs separately for the Arabidopsis and Petunia networks and defined them as those OTUs within the top 1% values of the degree of co-occurrence.

### Arabidopsis

|                  | Phylum          | Order                | Genus                |
|------------------|-----------------|----------------------|----------------------|
| <b>bOTU_584</b>  | Chloroflexi     | uncultured_bacterium | uncultured_bacterium |
| <b>bOTU_538</b>  | Acidobacteria   | unassigned           | unassigned           |
| <b>bOTU_1345</b> | Planctomycetes  | Planctomycetales     | uncultured           |
| <b>bOTU_1548</b> | Acidobacteria   | unassigned           | unassigned           |
| <b>bOTU_1655</b> | Planctomycetes  | Planctomycetales     | uncultured           |
| <b>bOTU_258</b>  | Verrucomicrobia | Chthoniobacterales   | uncultured_bacterium |
| <b>bOTU_2251</b> | Verrucomicrobia | uncultured_bacterium | uncultured_bacterium |
| <b>bOTU_624</b>  | Verrucomicrobia | Chthoniobacterales   | uncultured_bacterium |

In the Arabidopsis network 8 keystone OTUs were found. These were 8 bacteria and 0 fungi. The following keystone OTUs occur in p-responsive module M27: bOTU\_584, bOTU\_538, bOTU\_1345, bOTU\_1548, bOTU\_1655, bOTU\_258, bOTU\_2251, bOTU\_624.

### Petunia

|                  | Phylum         | Order            | Genus      |
|------------------|----------------|------------------|------------|
| <b>bOTU_920</b>  | Firmicutes     | Clostridiales    | unassigned |
| <b>bOTU_3183</b> | Acidobacteria  | Acidobacteriales | uncultured |
| <b>bOTU_1391</b> | Firmicutes     | Clostridiales    | unassigned |
| <b>bOTU_899</b>  | Actinobacteria | Acidimicrobiales | unassigned |

|                 | Phylum        | Order       | Genus       |
|-----------------|---------------|-------------|-------------|
| <b>fOTU_6</b>   | Glomeromycota | Glomerales  | unassigned  |
| <b>fOTU_109</b> | unassigned    | unassigned  | unassigned  |
| <b>fOTU_382</b> | Ascomycota    | Hypocreales | Trichoderma |
| <b>fOTU_341</b> | unassigned    | unassigned  | unassigned  |
| <b>fOTU_111</b> | Glomeromycota | Glomerales  | unassigned  |

In the Arabidopsis network 9 keystone OTUs were found. These were 4 bacteria and 5 fungi. The following keystone OTUs occur in p-responsive modules: fOTU\_6, fOTU\_109, fOTU\_111.

Vizualization of keystone OTUs in network graphss

**keystone OTUS in Arabidopsis**

**keystone OTUS in Petunia**

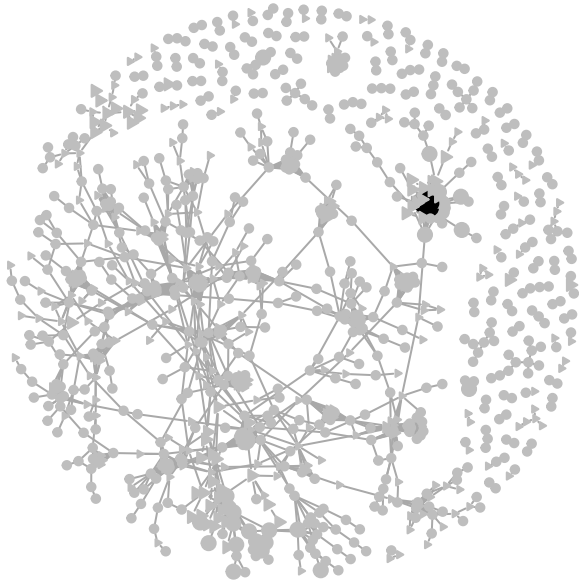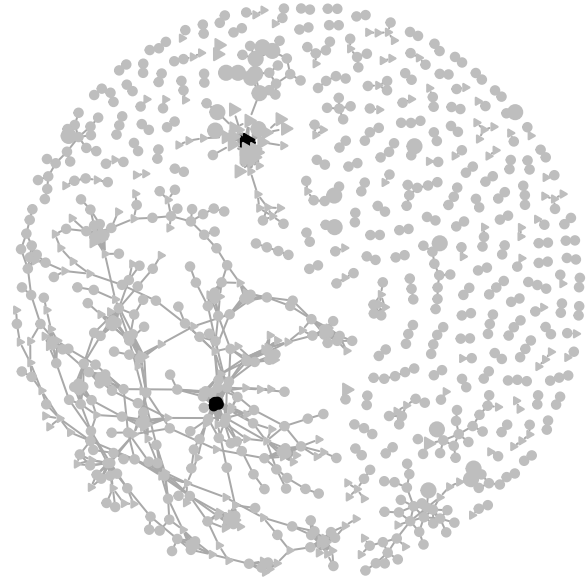

Supplement: Supplementary file [file 400119-3.pdf]
